# Supplementary material for: Briavioids E–G, Newly Isolated Briarane-Diterpenoids from a Cultured Octocoral Briareum violaceum
Source: MDPI journal article supplement (doi:10.3390/md21020124), 2023-02-14
Supplement: s1 [file s1]

## Supporting information

|                                                                                                   |    |
|---------------------------------------------------------------------------------------------------|----|
| S1. ESIMS spectrum of compound <b>1</b> .....                                                     | 2  |
| S2. HRESIMS spectrum of compound <b>1</b> .....                                                   | 2  |
| S3. IR spectrum of compound <b>1</b> .....                                                        | 3  |
| S4. <sup>1</sup> H NMR spectrum (400 MHz) of compound <b>1</b> in CDCl <sub>3</sub> .....         | 3  |
| S5. <sup>13</sup> C NMR spectrum (100 MHz) of compound <b>1</b> in CDCl <sub>3</sub> .....        | 4  |
| S6. DEPT spectra of compound <b>1</b> in CDCl <sub>3</sub> .....                                  | 4  |
| S7. HSQC spectrum of compound <b>1</b> in CDCl <sub>3</sub> .....                                 | 5  |
| S8. HMBC spectrum of compound <b>1</b> in CDCl <sub>3</sub> .....                                 | 5  |
| S9. <sup>1</sup> H- <sup>1</sup> H COSY spectrum of compound <b>1</b> in CDCl <sub>3</sub> .....  | 6  |
| S10. NOESY spectrum of compound <b>1</b> in CDCl <sub>3</sub> .....                               | 6  |
| S11. ESIMS spectrum of compound <b>2</b> .....                                                    | 7  |
| S12. HRESIMS spectrum of compound <b>2</b> .....                                                  | 7  |
| S13. IR spectrum of compound <b>2</b> .....                                                       | 8  |
| S14. <sup>1</sup> H NMR spectrum (400 MHz) of compound <b>2</b> in CDCl <sub>3</sub> .....        | 8  |
| S15. <sup>13</sup> C NMR spectrum (100 MHz) of compound <b>2</b> in CDCl <sub>3</sub> .....       | 9  |
| S16. DEPT spectra of compound <b>2</b> in CDCl <sub>3</sub> .....                                 | 9  |
| S17. HSQC spectrum of compound <b>2</b> in CDCl <sub>3</sub> .....                                | 10 |
| S18. HMBC spectrum of compound <b>2</b> in CDCl <sub>3</sub> .....                                | 10 |
| S19. <sup>1</sup> H- <sup>1</sup> H COSY spectrum of compound <b>2</b> in CDCl <sub>3</sub> ..... | 11 |
| S20. NOESY spectrum of compound <b>2</b> in CDCl <sub>3</sub> .....                               | 11 |
| S21. ESIMS spectrum of compound <b>3</b> .....                                                    | 12 |
| S22. HRESIMS spectrum of compound <b>3</b> .....                                                  | 12 |
| S23. IR spectrum of compound <b>3</b> .....                                                       | 13 |
| S24. <sup>1</sup> H NMR spectrum (600 MHz) of compound <b>3</b> in CDCl <sub>3</sub> .....        | 13 |
| S25. <sup>13</sup> C NMR spectrum (150 MHz) of compound <b>3</b> in CDCl <sub>3</sub> .....       | 14 |
| S26. HSQC spectrum of compound <b>3</b> in CDCl <sub>3</sub> .....                                | 14 |
| S27. HMBC spectrum of compound <b>3</b> in CDCl <sub>3</sub> .....                                | 15 |
| S28. <sup>1</sup> H- <sup>1</sup> H COSY spectrum of compound <b>3</b> in CDCl <sub>3</sub> ..... | 15 |
| S29. NOESY spectrum of compound <b>3</b> in CDCl <sub>3</sub> .....                               | 16 |

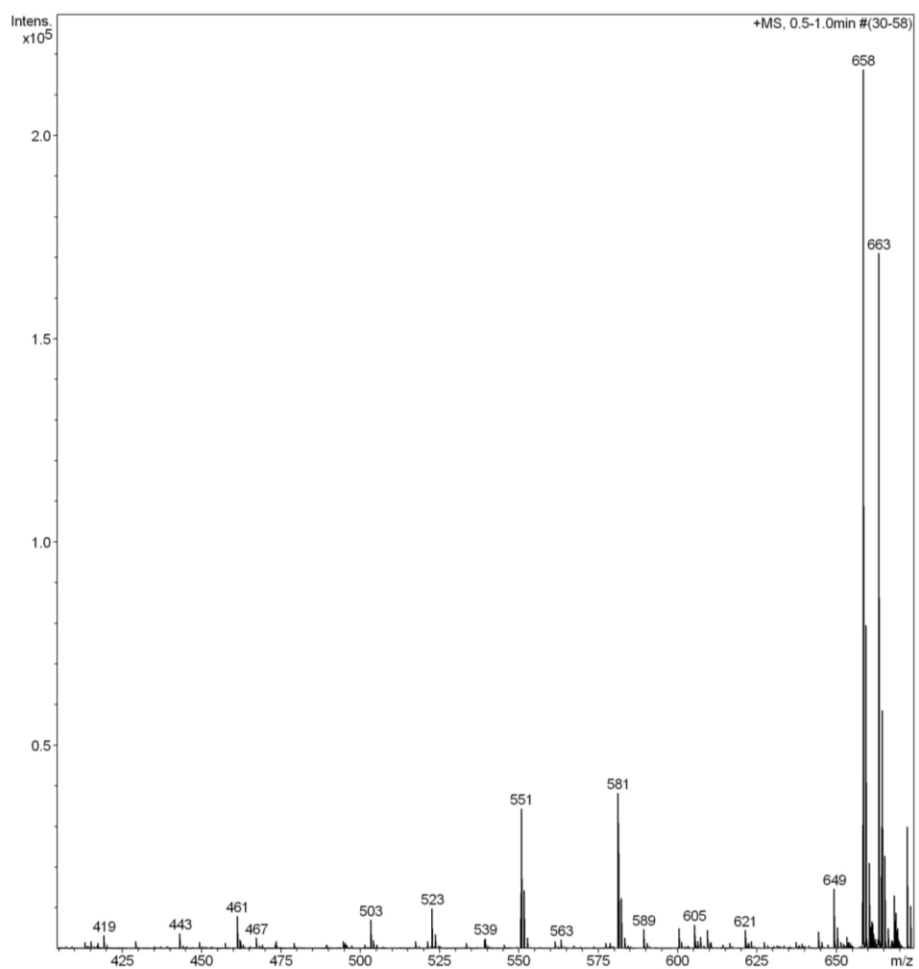

S1. ESIMS spectrum of compound **1**

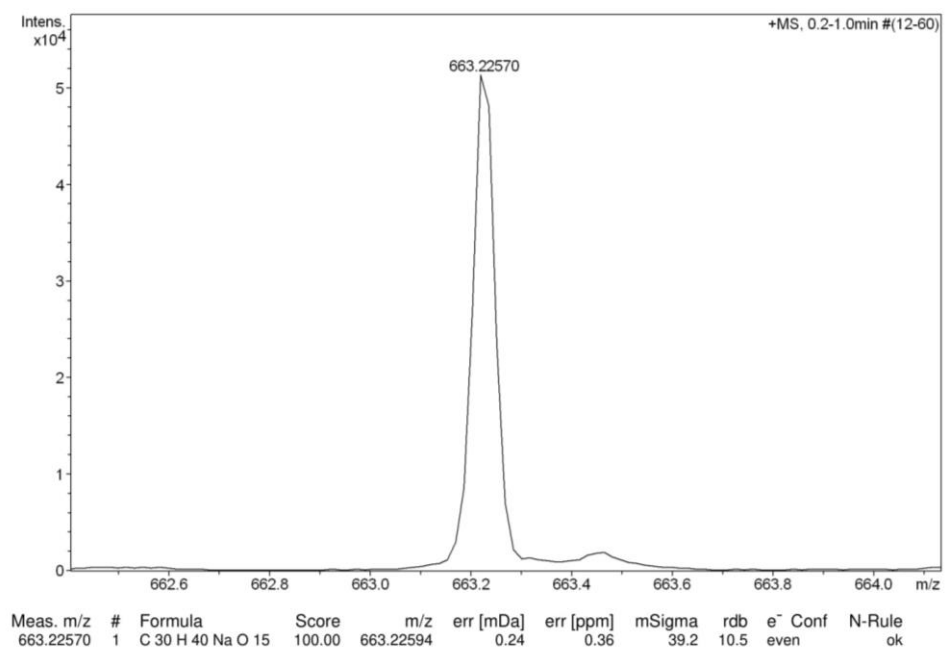

S2. HRESIMS spectrum of compound **1**

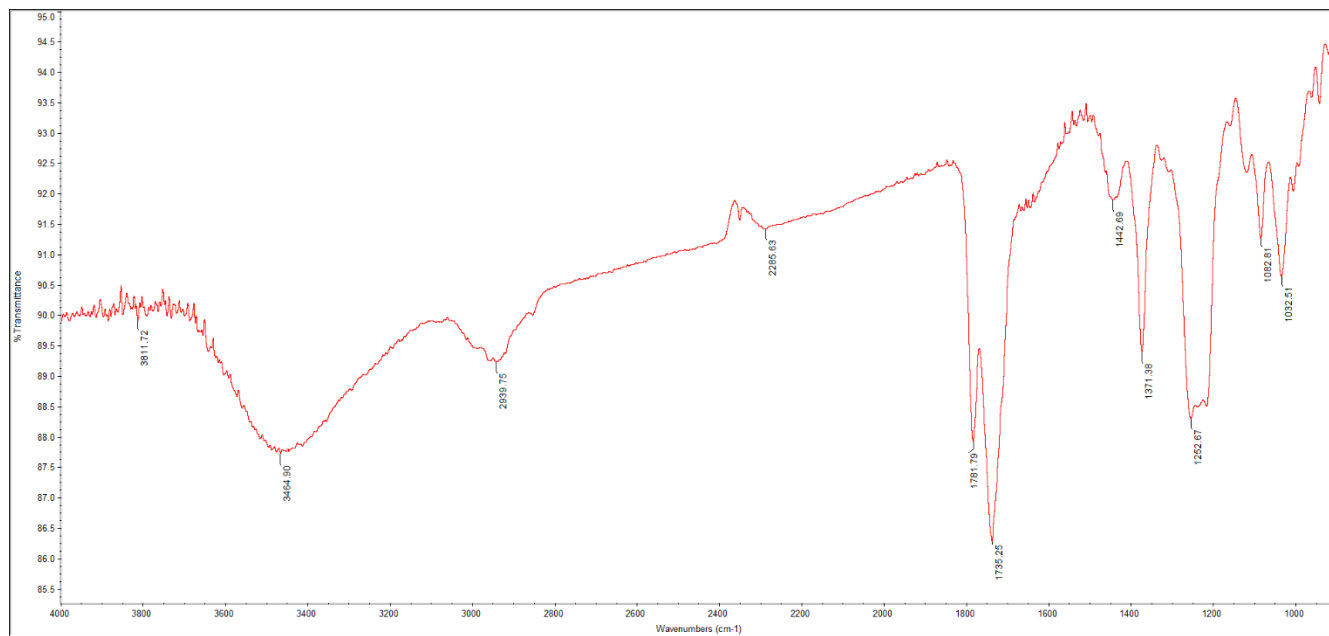

S3. IR spectrum of compound **1**

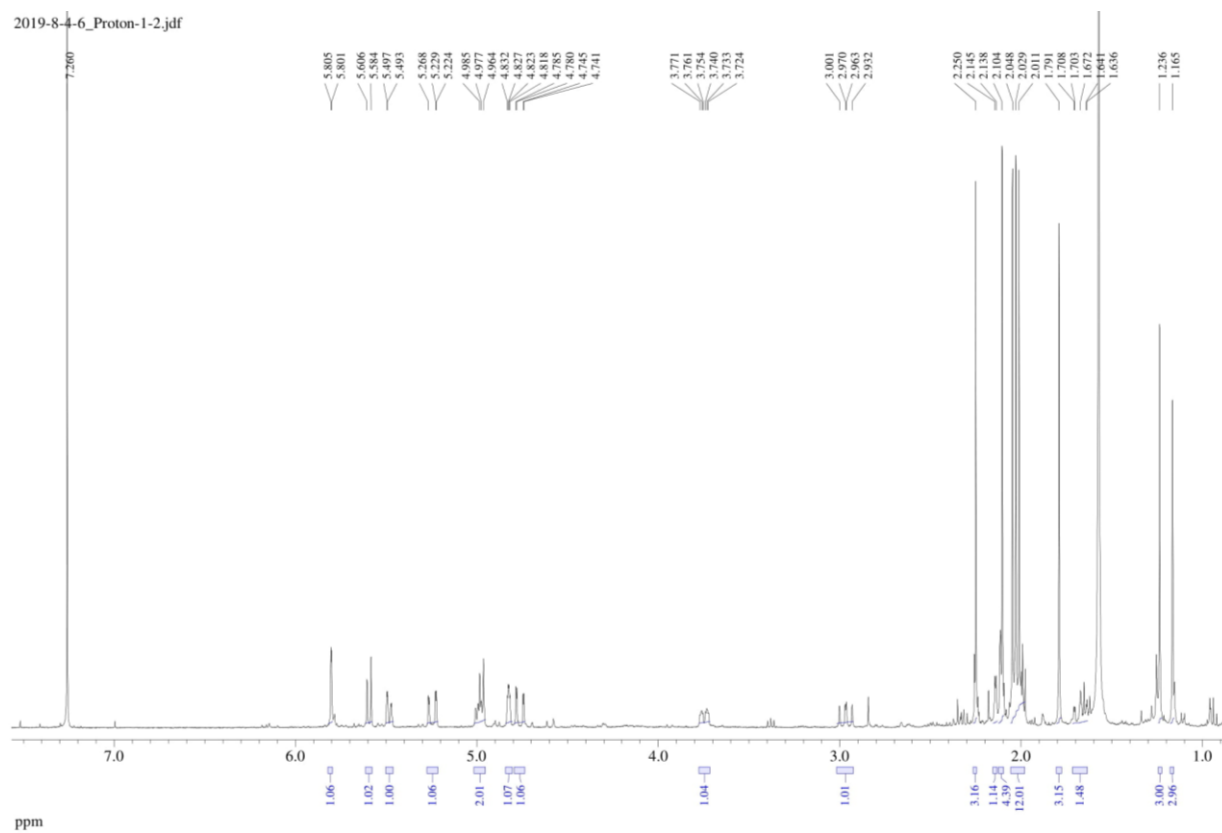

S4. <sup>1</sup>H NMR spectrum (400 MHz) of compound **1** in CDCl<sub>3</sub>

2019-8-4-6\_13C-1-2.jdf

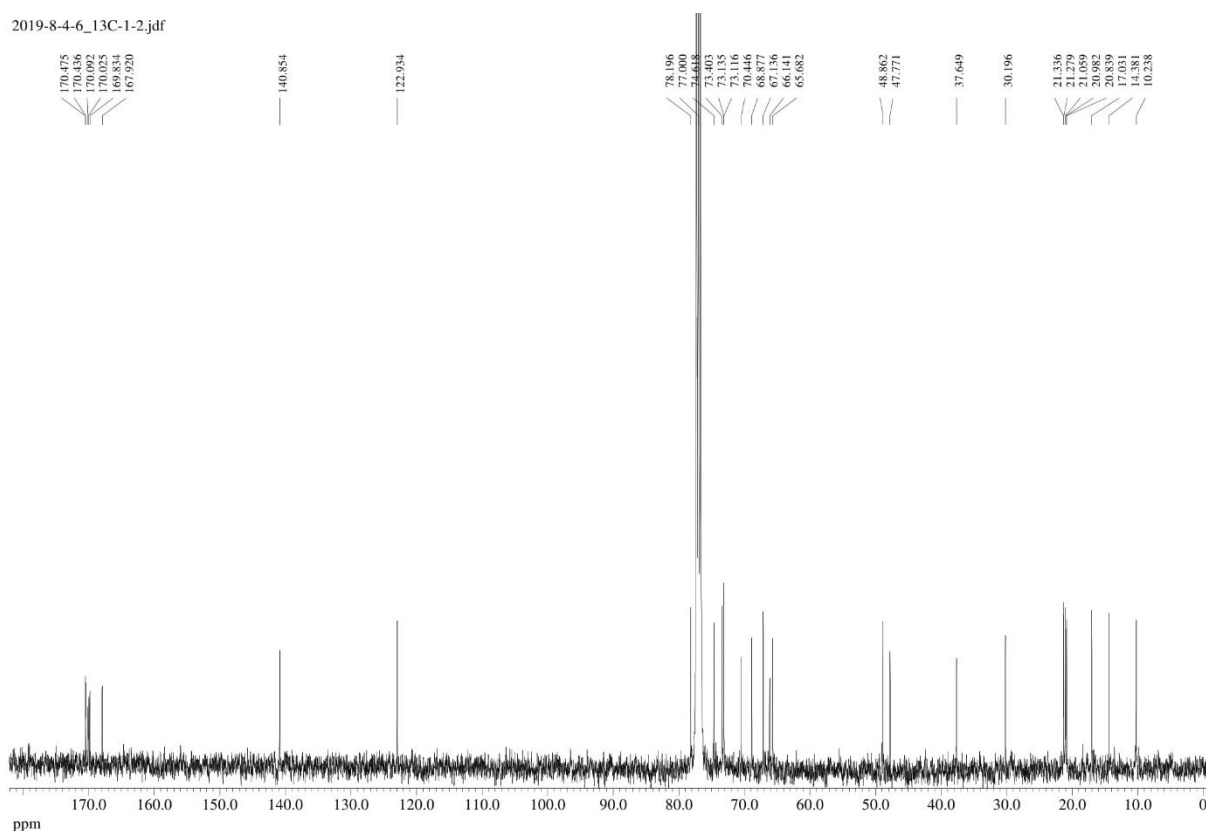

S5.  $^{13}\text{C}$  NMR spectrum (100 MHz) of compound **1** in  $\text{CDCl}_3$

2019-8-4-6\_dept-1-2.jdf Y = 135[deg]

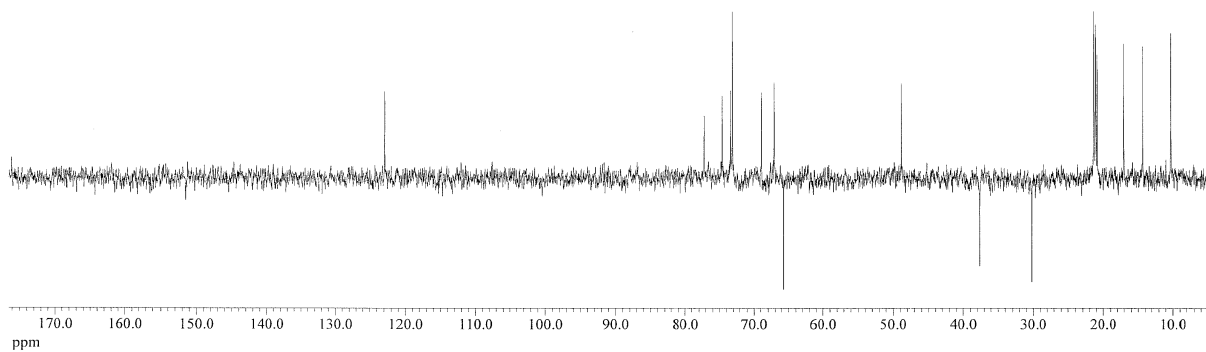

2019-8-4-6\_dept-1-2.jdf Y = 90[deg]

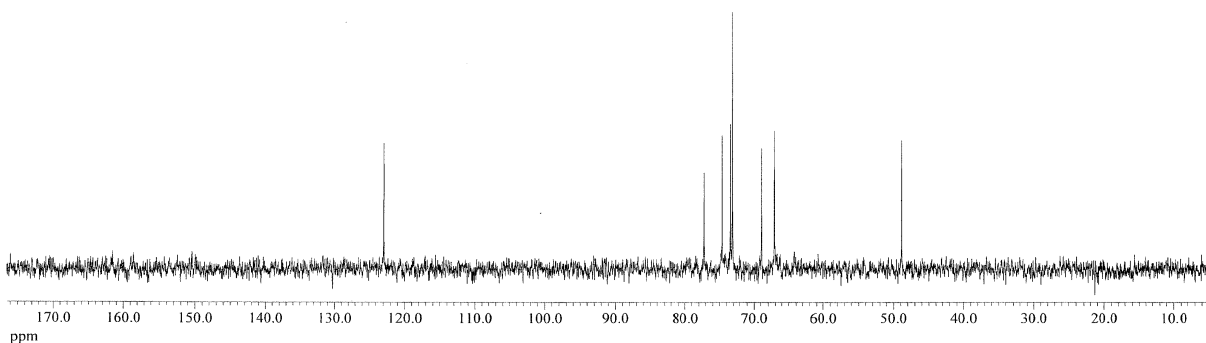

S6. DEPT spectra of compound **1** in  $\text{CDCl}_3$

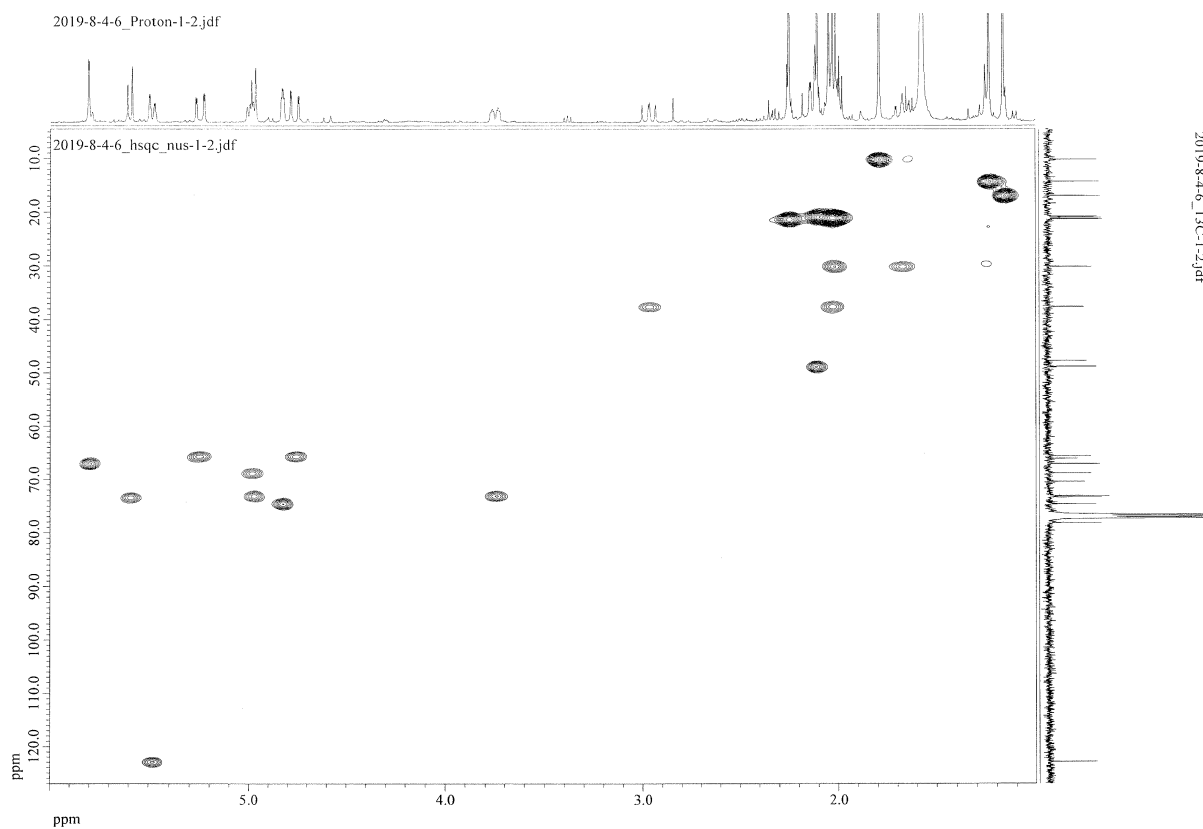

S7. HSQC spectrum of compound **1** in  $\text{CDCl}_3$

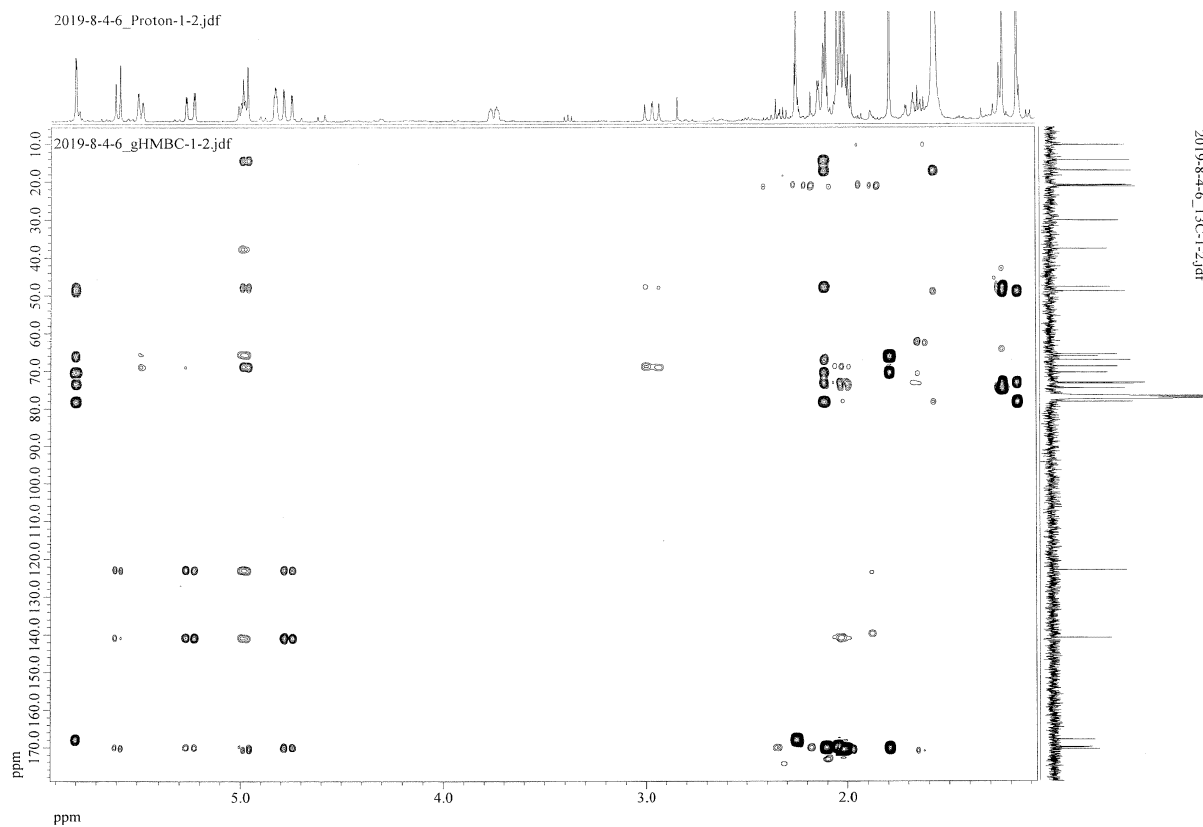

S8. HMBC spectrum of compound **1** in  $\text{CDCl}_3$

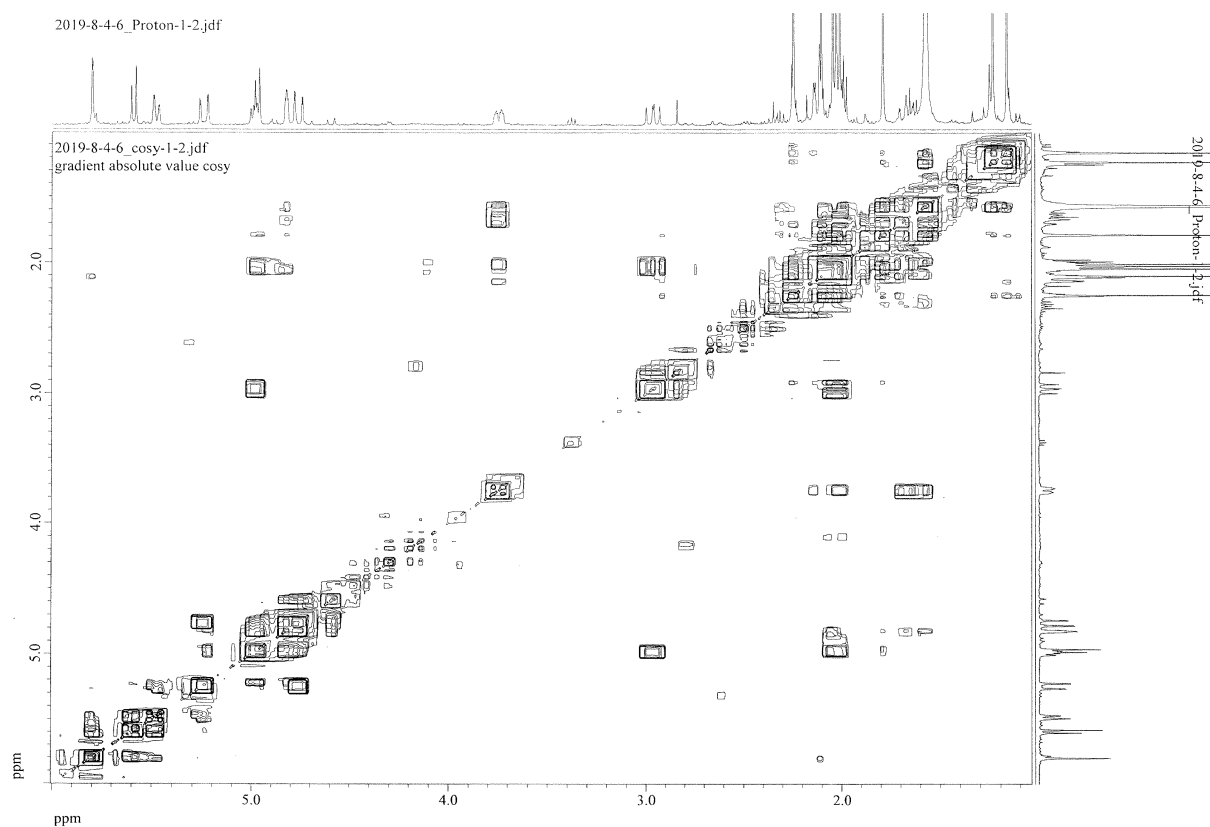

S9.  $^1\text{H}$ - $^1\text{H}$  COSY spectrum of compound **1** in  $\text{CDCl}_3$

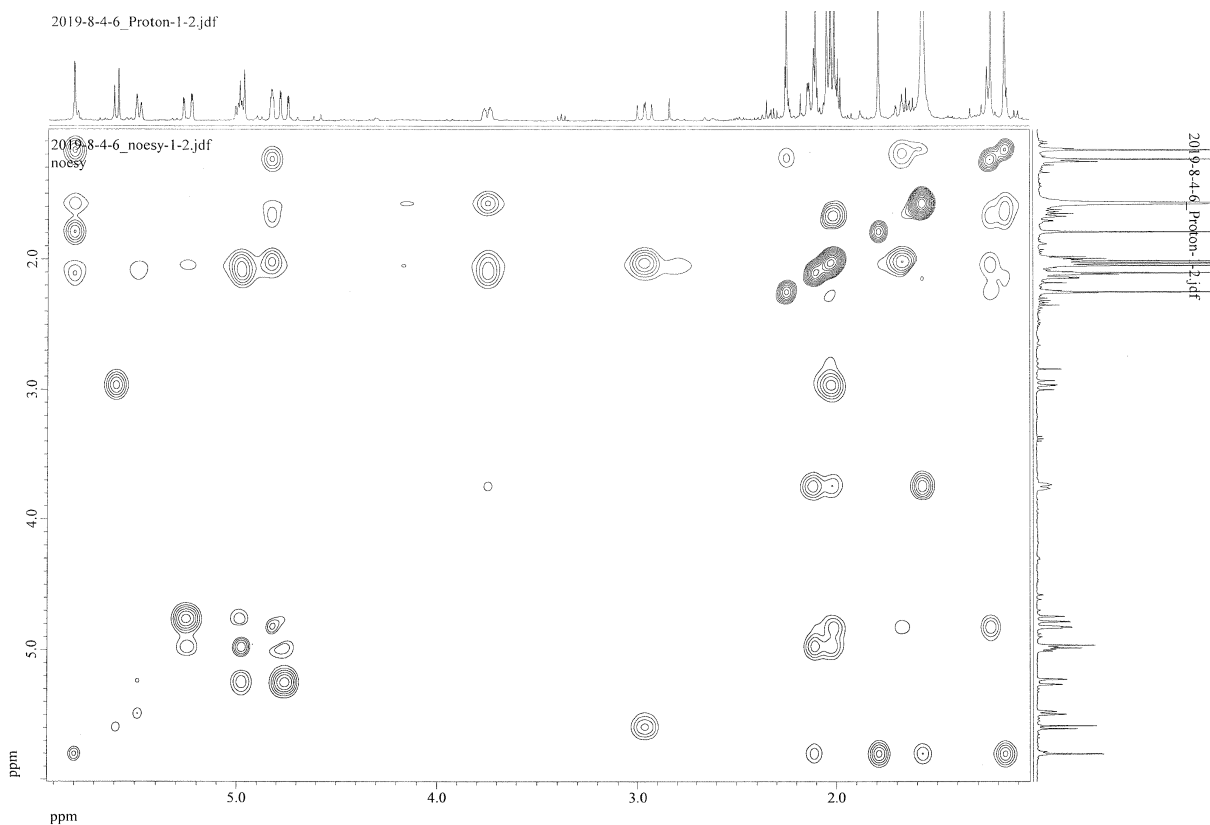

S10. NOESY spectrum of compound **1** in  $\text{CDCl}_3$

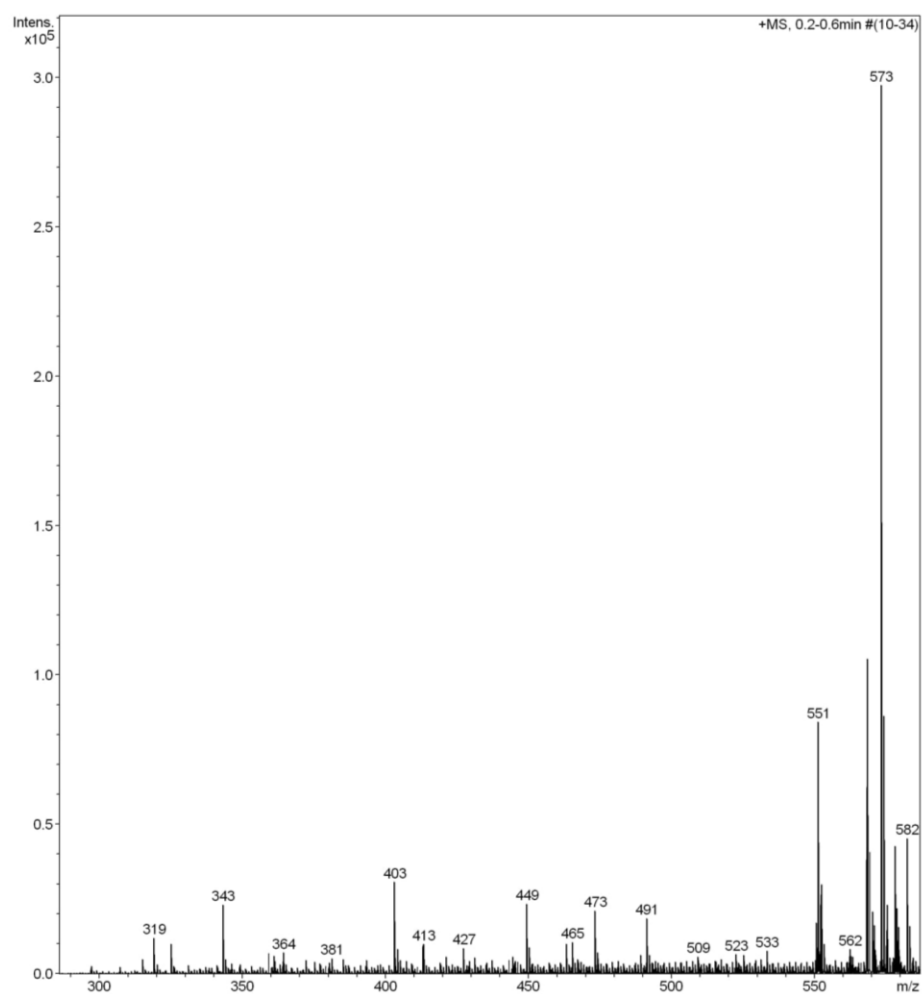

S11. ESIMS spectrum of compound 2

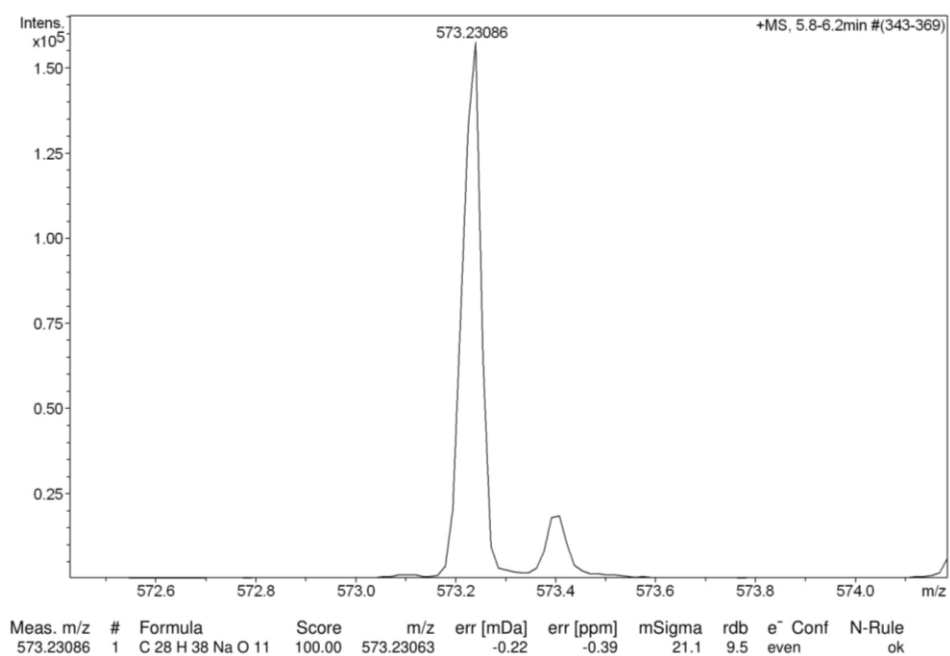

S12. HRESIMS spectrum of compound 2

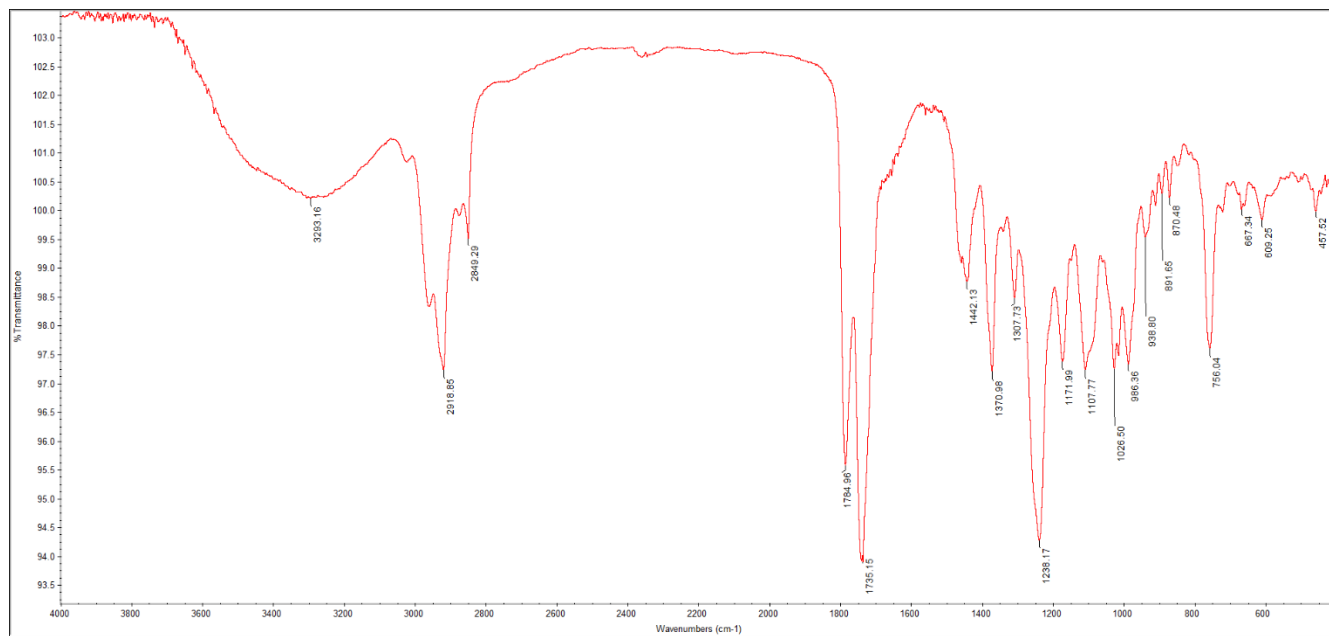

S13. IR spectrum of compound **2**

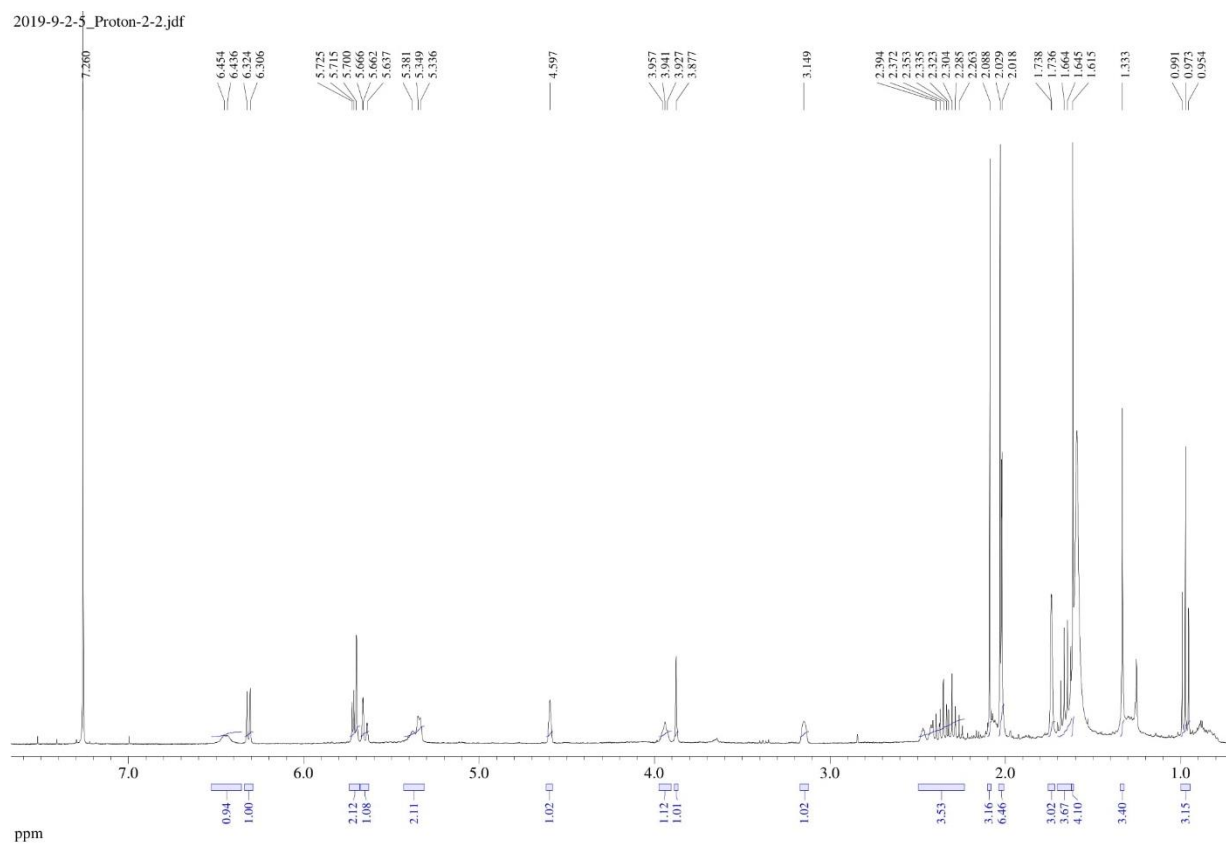

S14. <sup>1</sup>H NMR spectrum (400 MHz) of compound **2** in CDCl<sub>3</sub>



2019-9-2-5\_13C-1-2.jdf

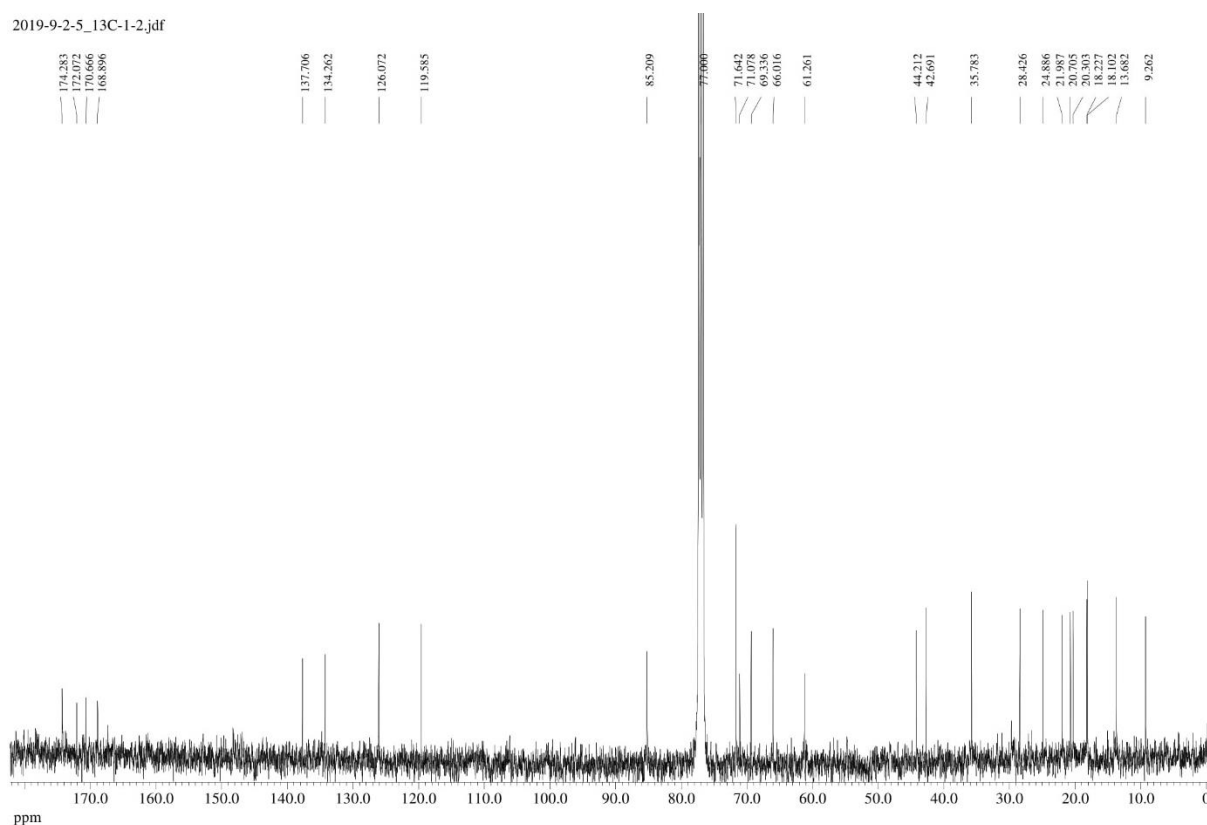

S15.  $^{13}\text{C}$  NMR spectrum (100 MHz) of compound **2** in  $\text{CDCl}_3$

2019-9-2-5\_dept-1-2.jdf Y = 135[deg]

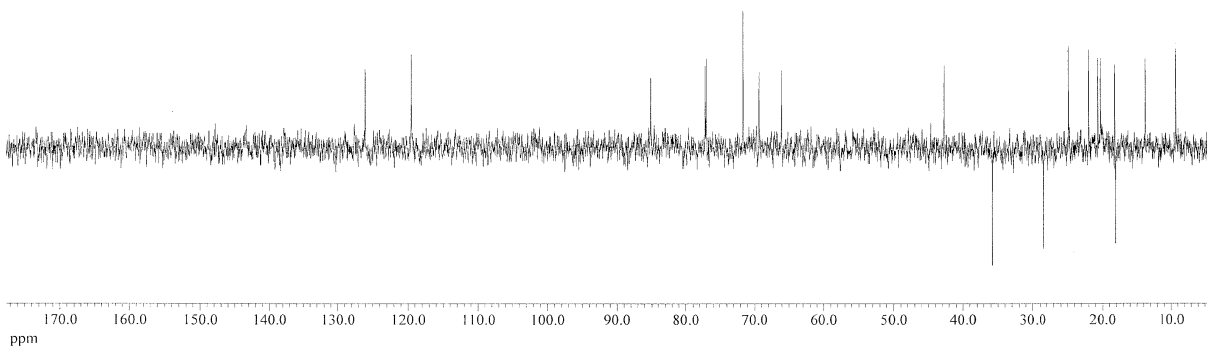

2019-9-2-5\_dept-1-2.jdf Y = 90[deg]

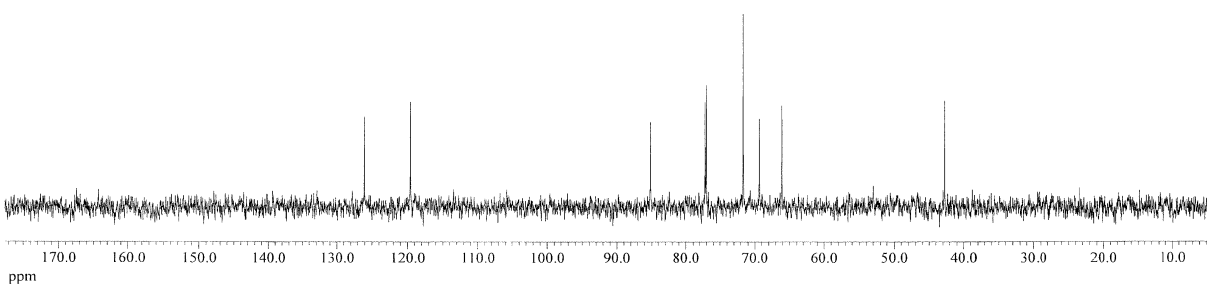

S16. DEPT spectra of compound **2** in  $\text{CDCl}_3$

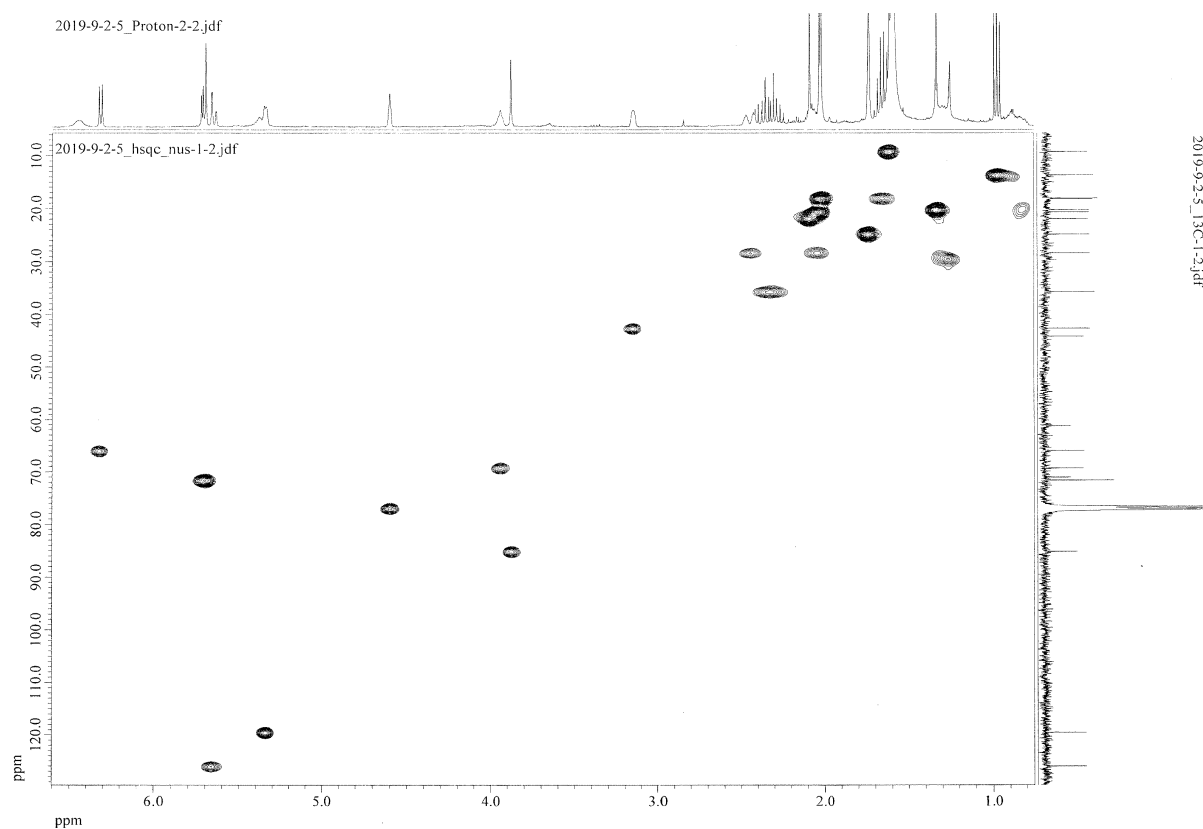

S17. HSQC spectrum of compound **2** in CDCl<sub>3</sub>

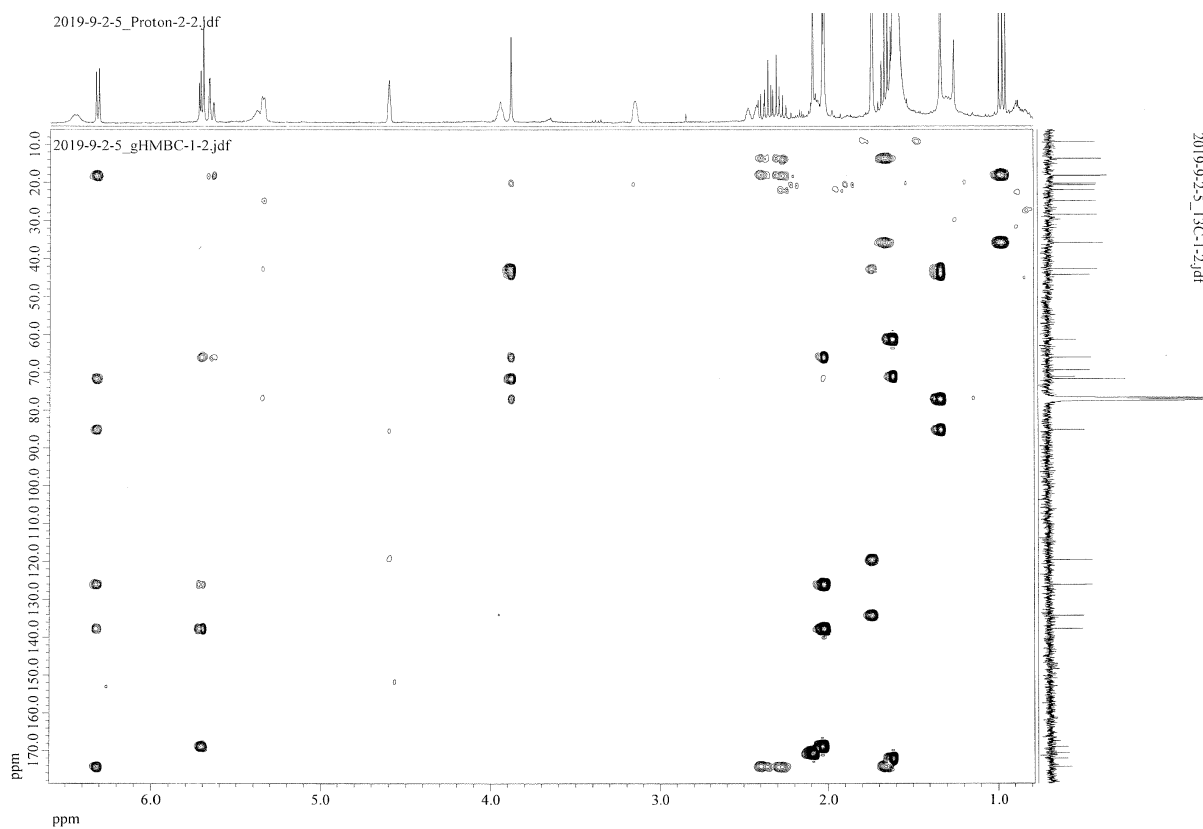

S18. HMBC spectrum of compound **2** in CDCl<sub>3</sub>

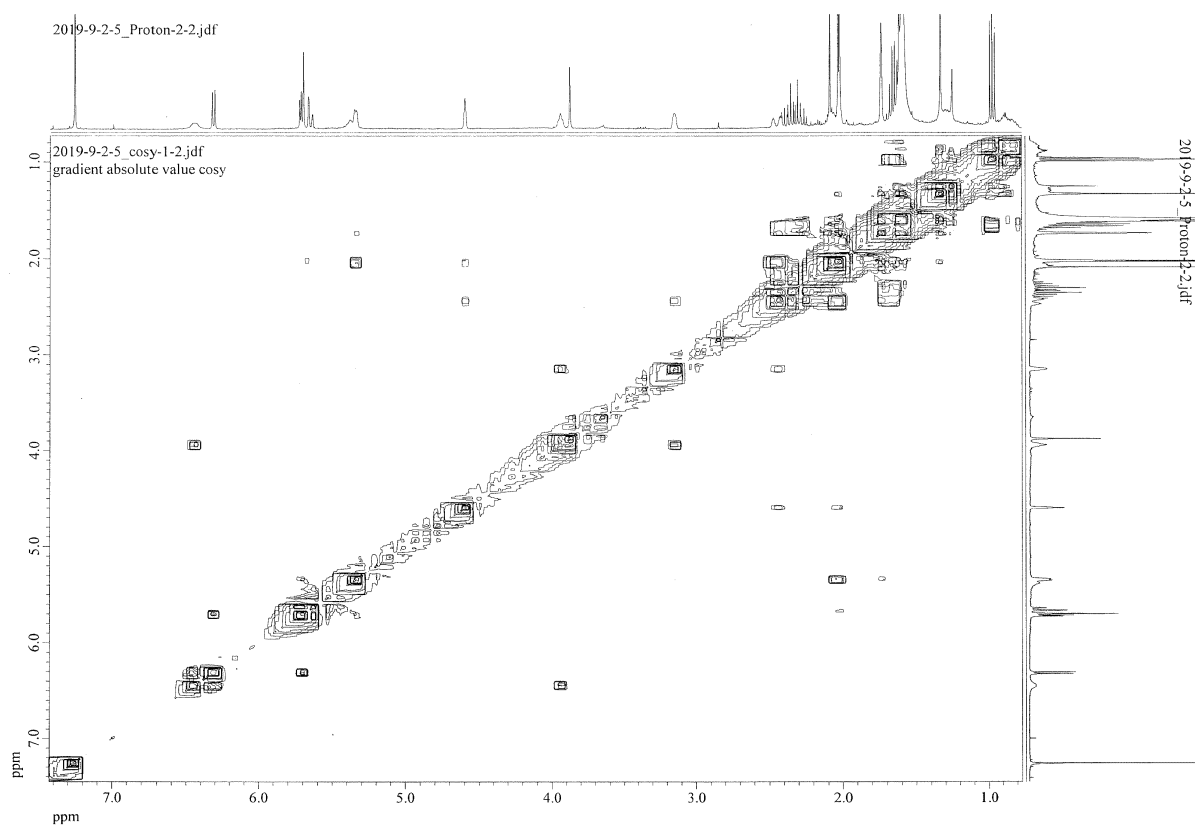

S19.  $^1\text{H}$ - $^1\text{H}$  COSY spectrum of compound **2** in  $\text{CDCl}_3$

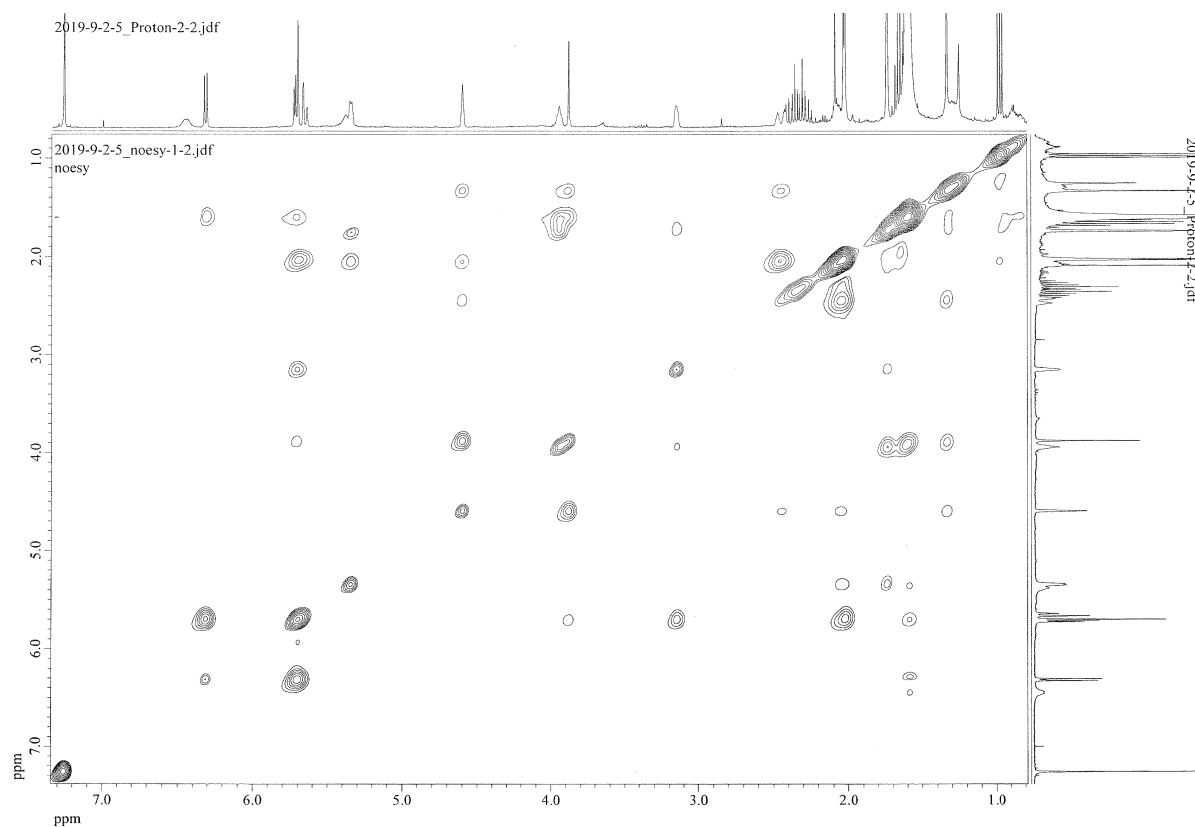

S20. NOESY spectrum of compound **2** in  $\text{CDCl}_3$

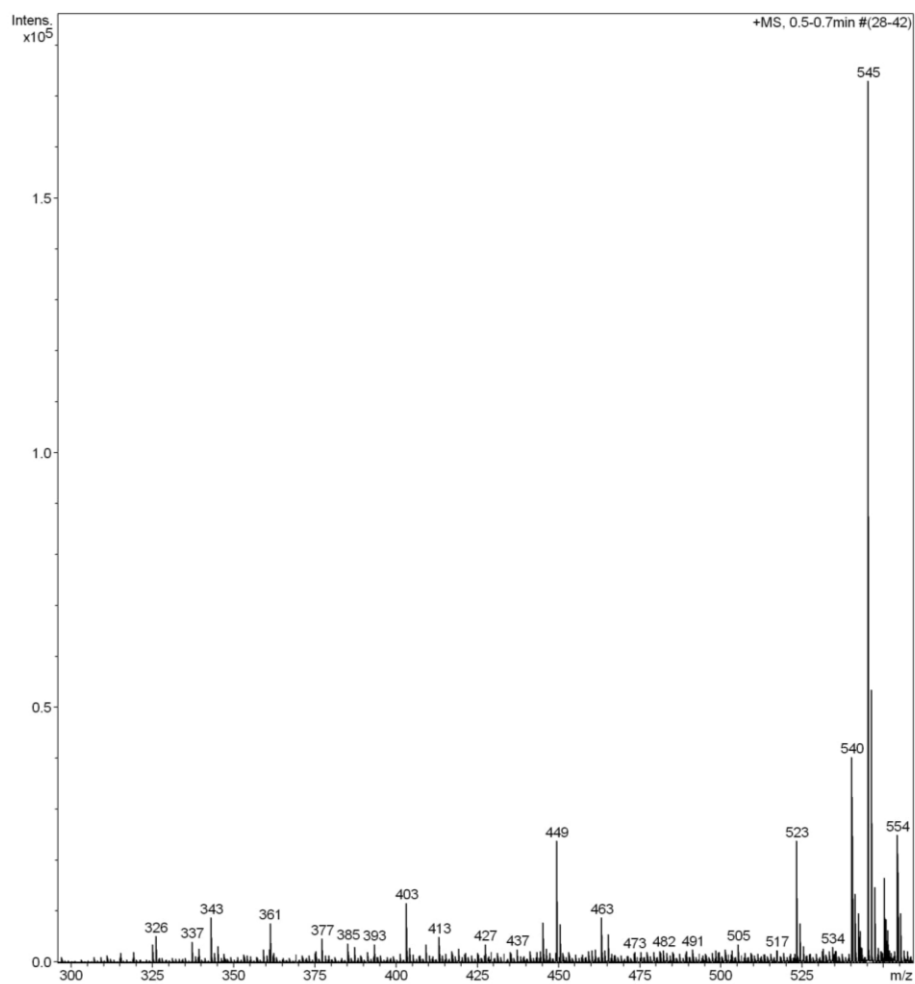

S21. HRESIMS spectrum of compound **3**

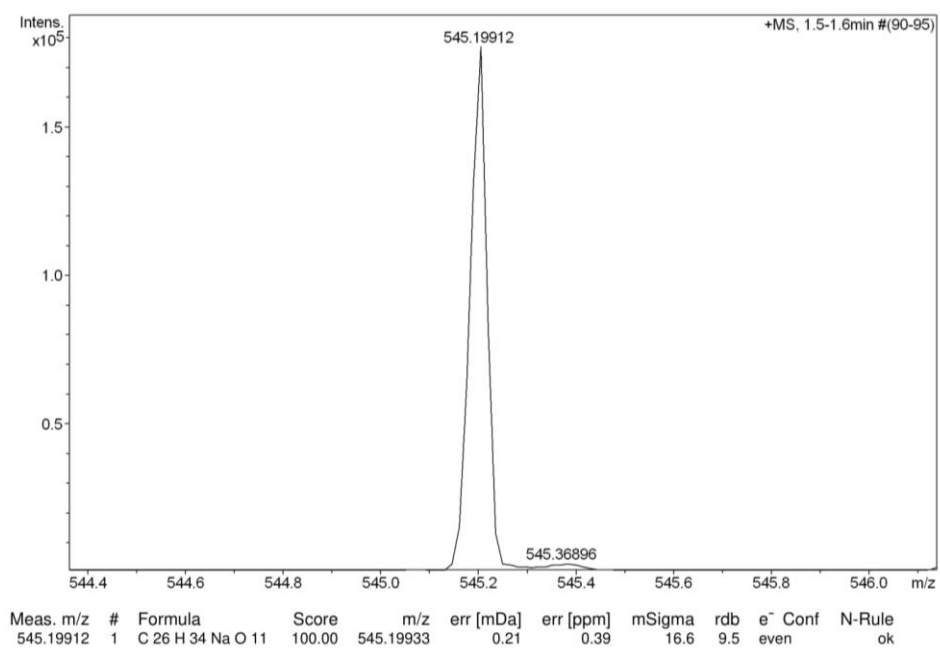

S22. HRESIMS spectrum of compound **3**

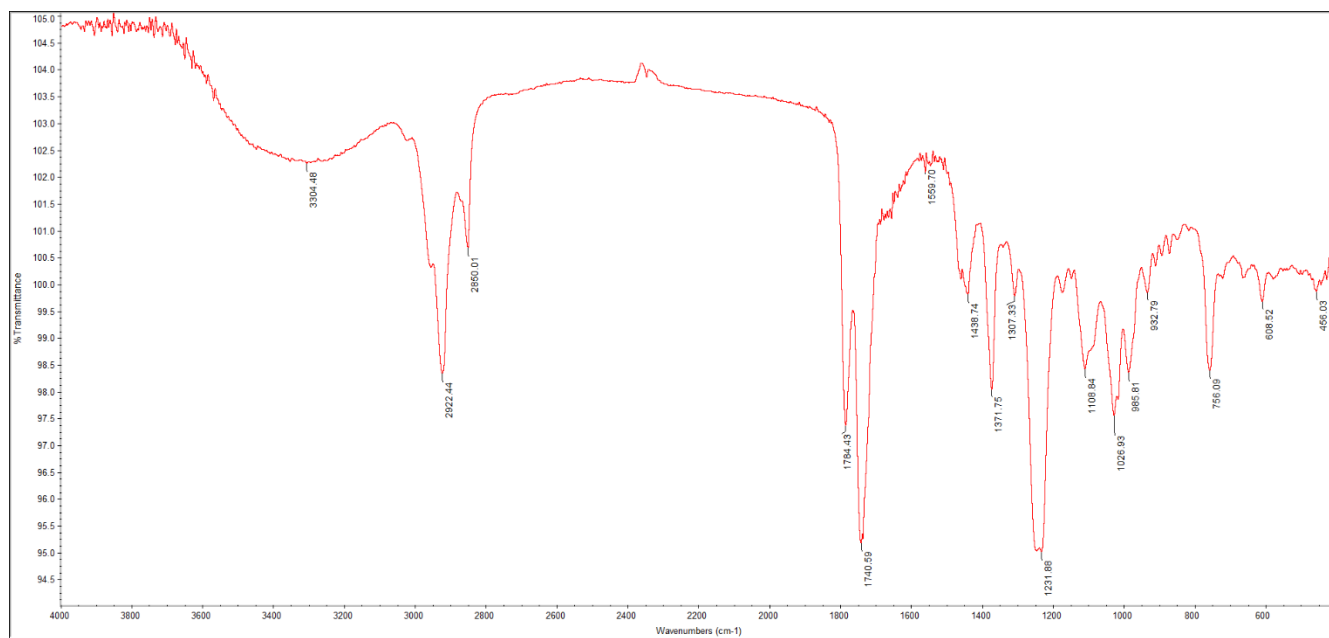

S23. IR spectrum of compound **3**

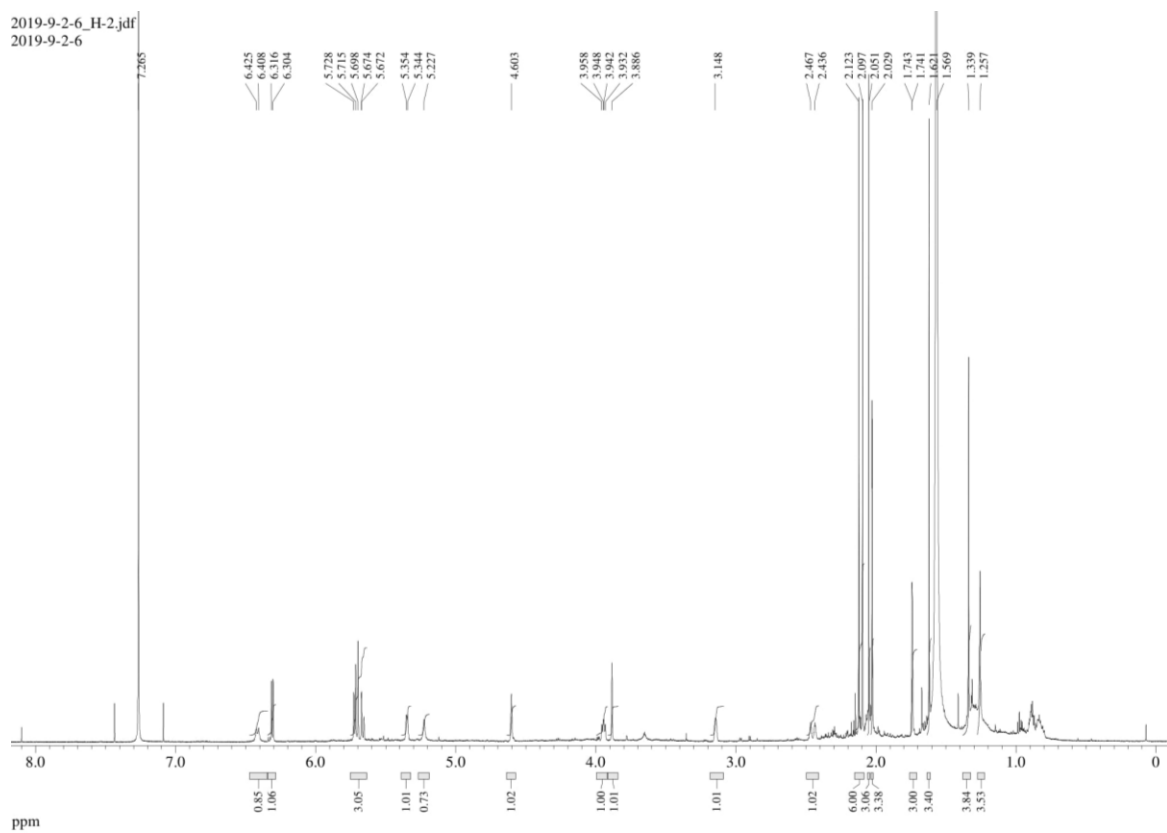

S24. <sup>1</sup>H NMR spectrum (600 MHz) of compound **3** in CDCl<sub>3</sub>

2019-9-2-6\_C-2.jdf  
2019-9-2-6

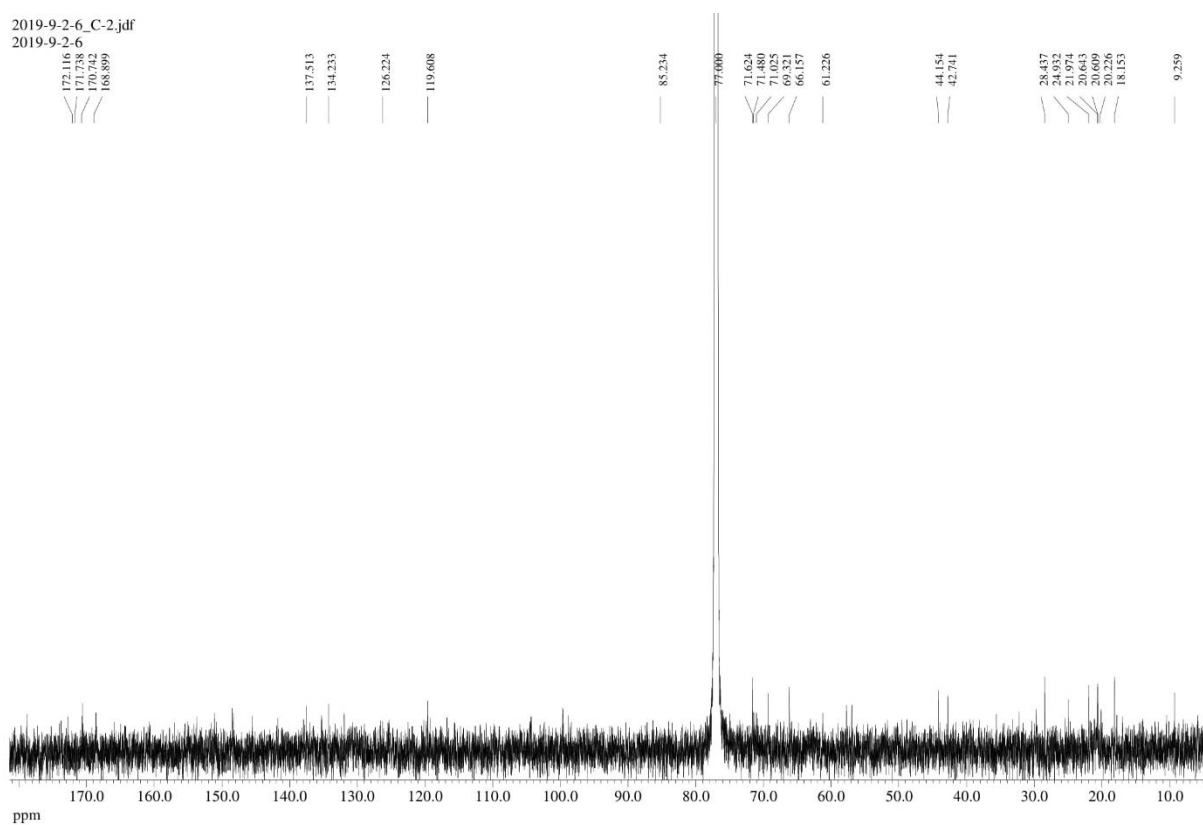

S25.  $^{13}\text{C}$  NMR spectrum (150 MHz) of compound **3** in  $\text{CDCl}_3$

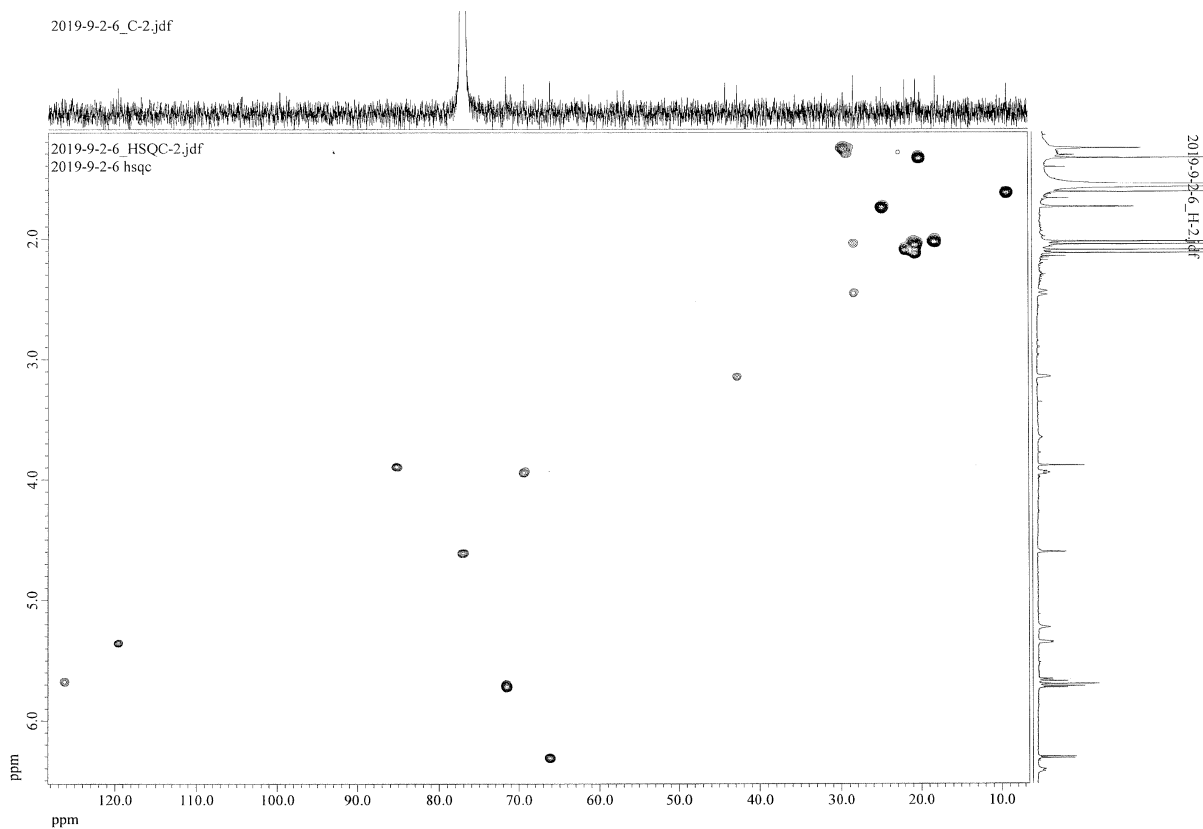

S26. HSQC spectrum of compound **3** in  $\text{CDCl}_3$

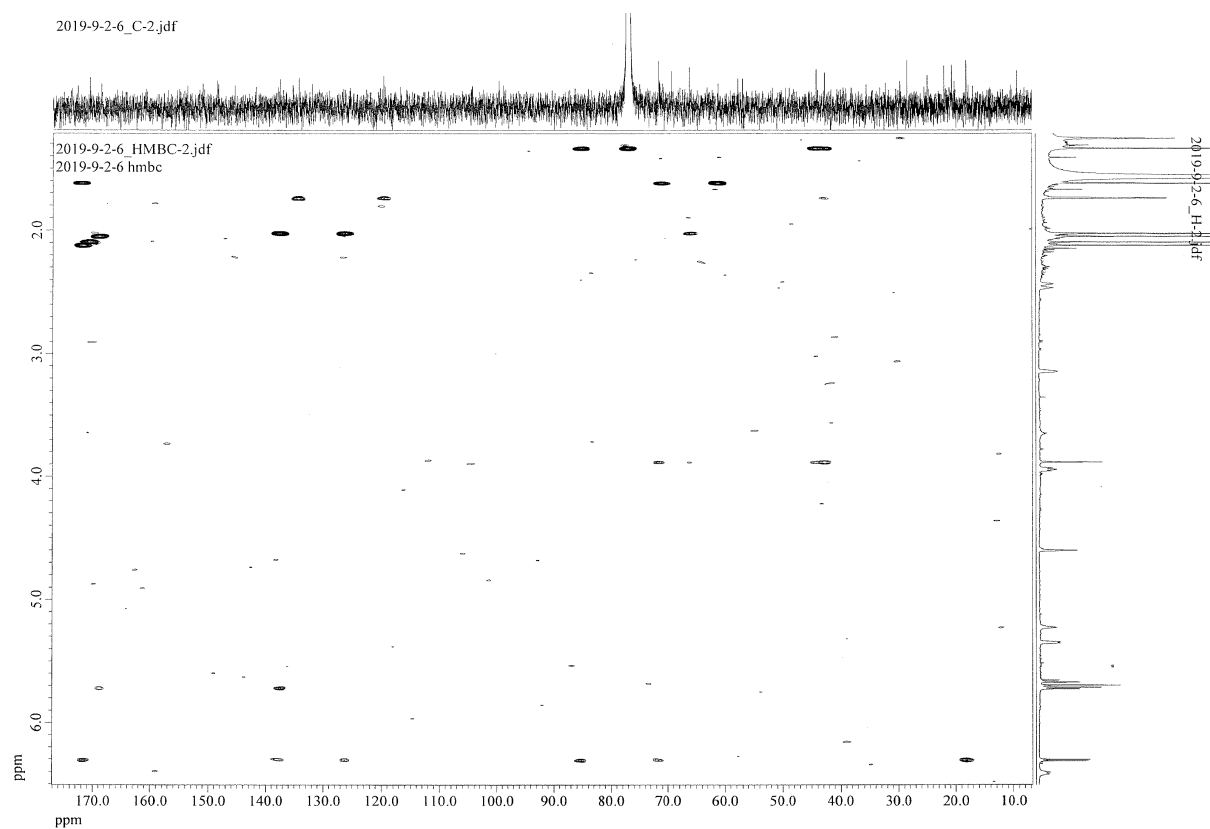

S27. HMBC spectrum of compound **3** in CDCl<sub>3</sub>

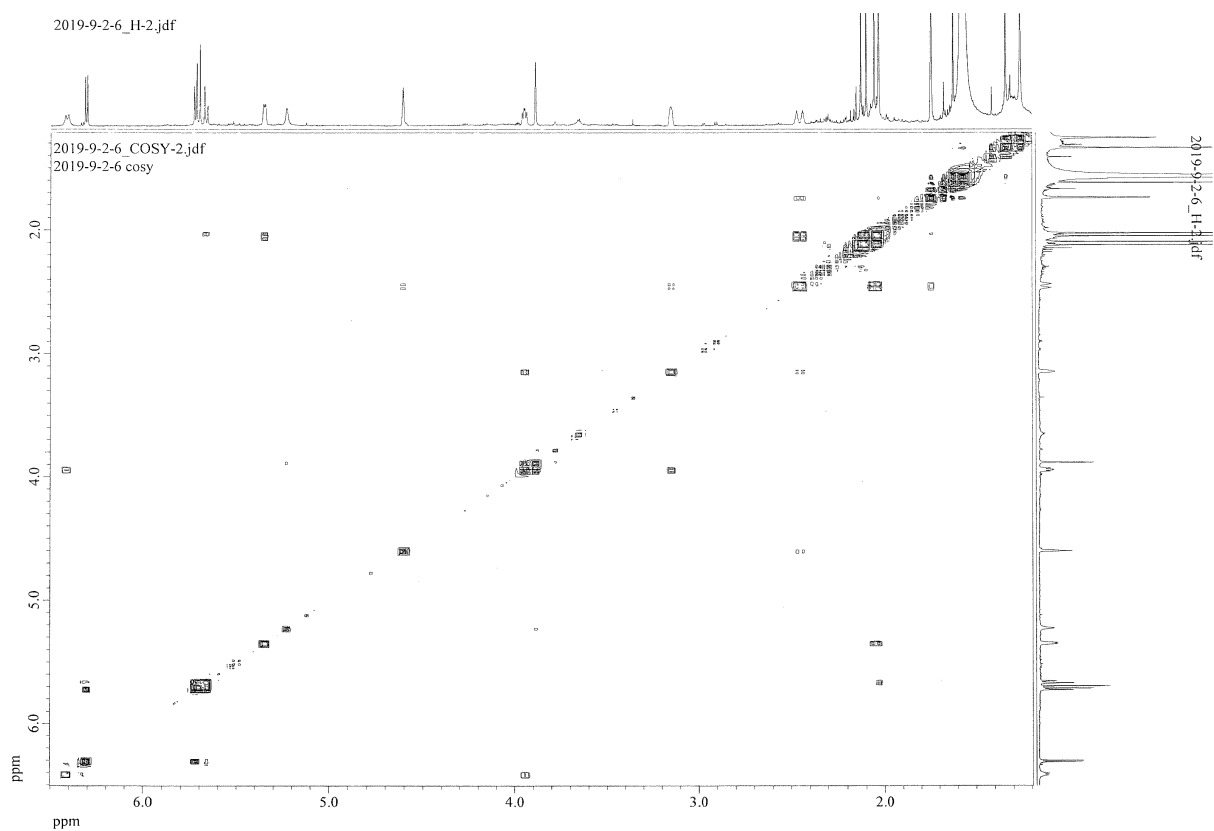

S28. <sup>1</sup>H-<sup>1</sup>H COSY spectrum of compound **3** in CDCl<sub>3</sub>

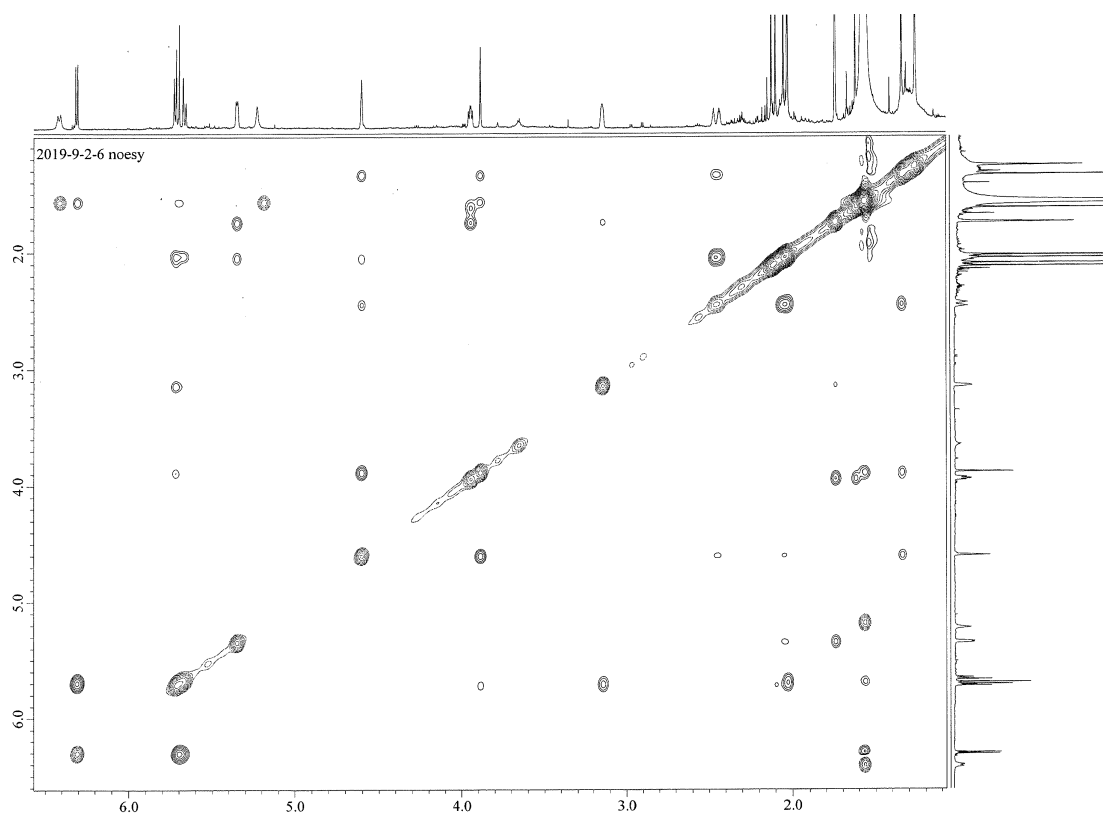

S29. NOESY spectrum of compound **3** in CDCl<sub>3</sub>
